# Supplementary material
Source: publisher figshare collection journal article supplement (https://diabetesjournals.figshare.com/articles/dataset/_/25892740)
Supplement: Supplementary file 1 [file 1]

## **CLOuD Consortium**

A listing of the CLOuD Consortium with participating chief investigator (CI), principal investigators (PI), investigators (I), study coordinator (SC), study nurses (SN), research assistants (RA), pump educator (PE), and administrative manager (AM) is included below. The number of participants randomized at each site is indicated in parentheses after the sites' name.

### **Clinical collaborators**

**Nottingham Children's Hospital, Nottingham, UK** (n=21) Tabitha Randell (PI); Vreni Verhoeven (SN). **University of Cambridge, Cambridge, UK** (n=19) Roman Hovorka (CI), Ajay Thankmonay (PI); Carlo Acerini (PI); David Dunger (I); Charlotte Boughton (I); Julia Ware (I); Martin Tauschmann (I); Rama Lakshman (I); Janet Allen (SN), Malgorzata Wilinska (I), Sara Hartnell (PE), Alina Cezar (SC), Nicole Ashcroft (SC), Mirela de Barros Tamarozzi (SC), Meena Murthy (SC). **Alder Hey Children's Hospital, Liverpool, UK** (n=17) Atrayee Ghatak (PI); Keith Thornborough (SN), Jonathon Mimmagh (SN), Joanne Shakeshaft (AM), Karen Phelan (RA). **Oxford University Hospitals NHS Foundation Trust, Oxford, UK** (n=14) Rachel Besser (PI); Rebecca Law (SN), Clare Megson (SN), Jane Haest (PE), Alison West (SN), Imogen Stamford (SN). **Royal Hospital for Sick Children, Edinburgh, UK** (n=12) Daniela Elleri (PI); Morag McDonald (SN). **Southampton Children's Hospital, Southampton, UK** (n=12) Nicola Trevelyan (PI); Helen Dewar (SN), Rachel Brampton (SN), Gabrielle Price (SN), Gillian Crouch (SN). **Leeds Children's Hospital, Leeds, UK** (6) Fiona Campbell (PI); James Yong (I), Emily Metcalfe (SN), Andrew Cameron (RA).

### **Non-clinical collaborators**

**University of Edinburgh Usher Institute, Edinburgh, UK** Julia Lawton (I), David Rankin (I). **Jaeb Center for Health Research, Tampa, Florida, USA** Judy Sibayan (SC), Peter Calhoun (I), Ryan Bailey (I), Jessica Rusnak (RA), Brian Bugielski (RA). **Swansea University, Swansea, UK** Gareth Dunseath (I), Stephen Luzio (I). **Murdoch Children's Research Institute, Parkville, Victoria, Australia** Elisabeth Northam (I). **Wellcome Trust Centre for Human Genetics, Oxford, UK** John Todd (I). **Vyoo Agency, Lyon, France** Stéphane Roze (I). **Department of Paediatric Diabetes, Leeds Children's Hospital, Leeds, UK** Eleanor Scott (I).

**Data Safety & Monitoring Board:** Tim Jones, Chris Patterson, Peter Adolfsson.

**Trial Steering Committee:** John Gregory, Stephen Greene, Jo Blair, Alexia Passmore.
